# Supplementary material
Source: publisher figshare collection journal article supplement (https://frontiersin.figshare.com/ndownloader/files/22737677)
Supplement: Supplementary file [file 22737677]

Table S1 . Virulence gene profile of EAEC from visit 1 from DMP in which EAEC was the sole identified pathogen, and maximum number of stools in a 24 hour period from the patient with that isolate

| Strain  | AA fimbriae |             |              |              | CS22 | dispersin  |             | regulators |             | type VI secretion system effector | SPATES/toxins |            |            |            |             | predicted serotype |    | max stools |
|---------|-------------|-------------|--------------|--------------|------|------------|-------------|------------|-------------|-----------------------------------|---------------|------------|------------|------------|-------------|--------------------|----|------------|
|         | <i>aggA</i> | <i>aafA</i> | <i>agg4A</i> | <i>agg5A</i> |      | <i>aap</i> | <i>aatA</i> | <i>aar</i> | <i>aggR</i> |                                   | <i>astA</i>   | <i>pic</i> | <i>pet</i> | <i>sat</i> | <i>sepA</i> | O                  | H  |            |
| E31V1B  | +           |             |              |              |      | +          | +           | +          | +           | +                                 |               | +          |            | +          |             | NT                 | 10 | 6          |
| K2V1    | +           |             |              |              |      | +          | +           | +          | +           | +                                 |               | +          |            |            |             | 78                 | 2  | 10         |
| K22V1   | +           |             |              |              |      | +          | +           | +          | +           | +                                 |               | +          |            |            |             | 78                 | 2  | 3          |
| P73V1   | +           |             |              |              |      | +          | +           | +          | +           | +                                 | +             | +          | +          | +          |             | 92                 | 33 | 4          |
| E19V1A  |             | +           |              |              |      | +          | +           | +          | +           | +                                 | +             | +          | +          | +          |             | 44                 | 18 | 5          |
| K30V1   |             | +           |              |              |      | +          | +           | +          | +           | +                                 | +             | +          | +          | +          |             | 175                | 28 | 3          |
| P109V1  |             | +           |              |              |      | +          | +           | +          | +           | +                                 | +             | +          | +          | +          |             | 175                | 27 | 8          |
| P677V1  |             | +           |              |              |      | +          | +           | +          | +           | +                                 | +             | +          | +          | +          |             | 175                | 27 | 5          |
| E8V1A   |             |             | +            |              |      | +          | +           |            | +           | +                                 | +             | +          |            | +          | +           | 65                 | 12 | 8          |
| E16V1A  |             |             | +            |              |      | +          | +           |            | +           | +                                 |               | +          |            | +          | +           | 33                 | 32 | 5          |
| P433V1  |             |             | +            |              |      | +          | +           |            | +           | +                                 |               | +          |            |            | +           | 99                 | 4  | 7          |
| P406V1B |             |             |              | +            |      | +          | +           | +          | +           | +                                 |               | +          |            |            |             | 126                | 27 | 8          |
| P415V1  |             |             |              | +            |      | +          | +           | +          | +           | +                                 | +             | +          |            | +          |             | 3                  | 2  | 3          |
| E2V1A   |             |             |              |              | +    | +          | +           | +          | +           | +                                 | +             | +          |            |            | +           | 39                 | 49 | 6          |
| E7V1A   |             |             |              |              | +    | +          | +           | +          | +           | +                                 | +             | +          |            |            | +           | 39                 | 49 | ND         |
| E9V1A   |             |             |              |              | +    | +          | +           | +          | +           | +                                 | +             | +          |            |            | +           | 130                | 27 | 7          |
| K18V1   |             |             |              |              | +    | +          | +           | +          | +           | +                                 | +             | +          |            |            | +           | 9                  | 21 | 4          |
| K16V1   |             |             |              |              |      | +          | +           | +          | +           | +                                 |               | +          | +          |            | +           | NT                 | 19 | 4          |
| K44V1   |             |             |              |              |      | +          | +           | +          | +           | +                                 |               | +          | +          | +          | +           | 61                 | 4  | ND         |
| K29V1   |             |             |              |              |      | +          | +           |            |             |                                   |               |            |            |            |             | NT                 | 27 | 3          |
| K31V1   |             |             |              |              |      | +          | +           |            |             | +                                 | +             |            | +          |            |             | NT                 | 5  | 5          |
| K36V1   |             |             |              |              |      | +          | +           |            |             | +                                 |               |            |            | +          |             | 118/151            | 11 | 6          |
| E18V1A  |             |             |              |              |      |            |             |            |             | +                                 | +             | +          |            | +          |             | 130                | 26 | 5          |

ND- no data available

Boxes colored orange indicate the genes originally used to screen for the EAEC.

\*the *aaiC* gene in this isolate is the same variant as found in C700-09 (Jonsson et al.)

Box colored blue indicates a gene with 47% homology to *aap* from 042

Box colored yellow indicates a gene with low homology, 35%, was identified in the contig for this strain
